# Supplementary material for: MS/MS fragmentation-guided search of TMG-chitooligomycins and their structure–activity relationship in specific β-N-acetylglucosaminidase inhibition
Source: Royal Society of Chemistry journal article supplement (doi:10.1039/c0ob01090a), 2011-01-01
Supplement: c0ob01090a.pdf [file c0ob01090a.pdf]

# Electronic Supplementary Information

## MS/MS Fragmentation-guided search of TMG-chitooligomycins and their structure-activity relationship in specific $\beta$ -N-acetylglucosaminidase inhibition

Hirokazu Usuki,<sup>ab</sup> Yukihiro Yamamoto,<sup>a</sup> Yuya Kumagai,<sup>a</sup> Teruhiko Nitoda,<sup>c</sup> Hiroshi Kanzaki,<sup>c</sup> and Tadashi Hatanaka\*<sup>a</sup>

<sup>a</sup> Okayama Prefectural Technology Center for Agriculture, Forestry and Fisheries, Research Institute for Biological Sciences (RIBS), 7549-1 Kibichuo-cho, Kaga-gun, Okayama 716-1241, Japan, Fax: +81 866 56 9454; Tel: +81 866 56 9452, E-mail: hatanaka@bio-ribs.com

<sup>b</sup> Research Fellow of the Japan Society for the Promotion of Science (JSPS), Japan

<sup>c</sup> Laboratory of Bioresources Chemistry, The Graduate School of Natural Science and Technology, Okayama University, Okayama 700-8530, Japan

### Contents

#### Section-1: LC conditions

1-1: For isolation of **2** and **3** (Fig. 3).

1-2: For component sugar analysis.

1-3: For analysis of chitinase-treated **1**, **2**, and **3** (Fig. 5), and the time course experiment (Fig. 6).

#### Section-2: MS/MS spectra.

#### Section-3: Enzymatic characteristics of SCO2758 and SCO2786.

3-1: SDS PAGE analyses.

3-2: Enzymatic properties.

#### Section-4: Lineweaver-Burk plots of **2** and **3**.

#### Section-5: NMR data of **2** and **3**.

#### Section-6: NOESY spectra of free TMG and its <sup>4</sup>C<sub>1</sub> conformation

#### Section-7: Construction of ligand **2** for docking simulations with SpHEX.

#### Section-8: Docking simulation between the TMG(<sup>4</sup>C<sub>1</sub> form)-chitobiomycin and SpHex.

#### Section-9: UV absorption spectra of **2** and **3**.

### Section-1: LC/MRM analysis.

#### 1-1: For isolation of 2 and 3 (Fig. 3).

At each step of purification, a portion of the obtained fractions was analyzed by subsequent LC/MRM analysis using a Hypercarb column (2.1 x 100 mm). The mobile phase was water containing 0.1 % (v/v) HCOOH (A) and MeOH containing 0.1 % (v/v) HCOOH (B) at a flow rate of 0.3 ml/ min. The LC conditions were 100% A during 0–2 min, linearly increasing from 0–70 % B during 2–10 min, and 70% B during 10–15min.

#### 1-2: For component sugar analysis.

Authentic  $D$ -Glc and  $D$ -GlcNAc were subjected to the butanolysis and *N*-acetylation procedures as described in the main text. The obtained solution containing the corresponding butylglycoside was dried and subsequently dissolved in H<sub>2</sub>O. The solution was subjected to MS/MS analysis to construct specific MRM channels. The channels were used for the selective detection of corresponding butylglycosides. The column used was the same as in section 1-1. In this analysis, the mobile phase was water containing 0.1 % (v/v) HCOOH (A) and MeOH containing 0.1 % (v/v) HCOOH (B) at a flow rate of 0.3 ml/ min. The LC conditions were 100% A during 0–2 min, linearly increasing from 0–70 % B during 2–20 min, and 70% B during 20–24min. The analysis system was sufficient to distinguish the  $D$ - and  $L$ - forms of Glc as shown in Fig. S1.

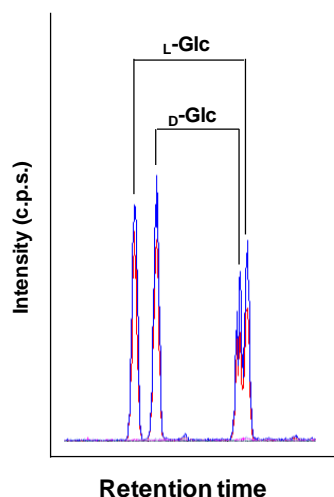

Fig. S1 Separation of (R)-2-butylglycoside of  $D/L$ -Glc

#### 1-3: For analysis of chitinase treated 1, 2, and 3 (Fig. 5), and the time course experiment (Fig. 6).

The column used was the same as in section 1-1. In this analysis, the mobile phase was water containing 0.1 % (v/v) HCOOH (A) and MeOH containing 0.1 % (v/v) HCOOH (B) at a flow rate of 0.3 ml/ min. The LC conditions were 100% A during 0–1 min, linearly increasing from 0–70 % B during 1–10 min, and 70% B during 10–14min.

Section-2: MS/MS spectra.

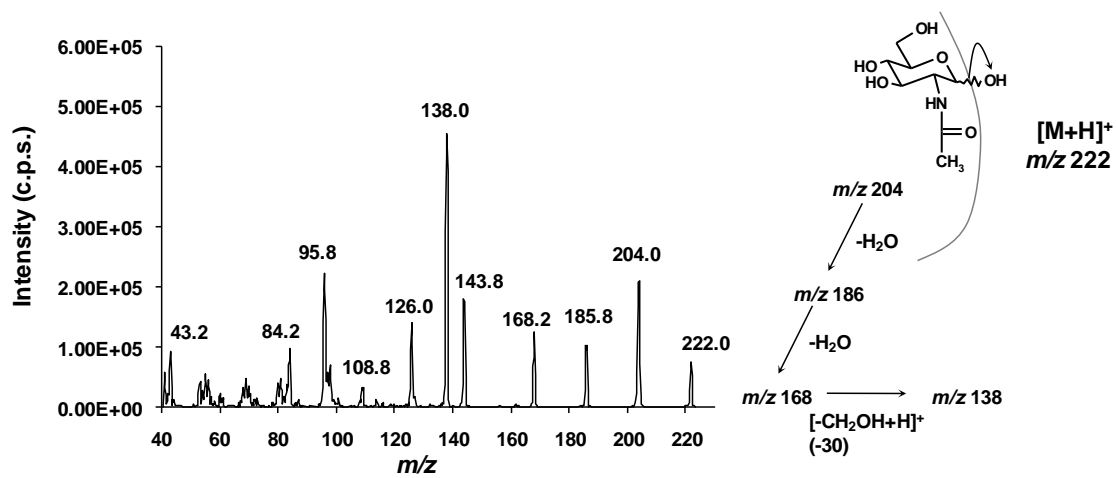

Fig. S2 MS/MS spectrum of GlcNAc

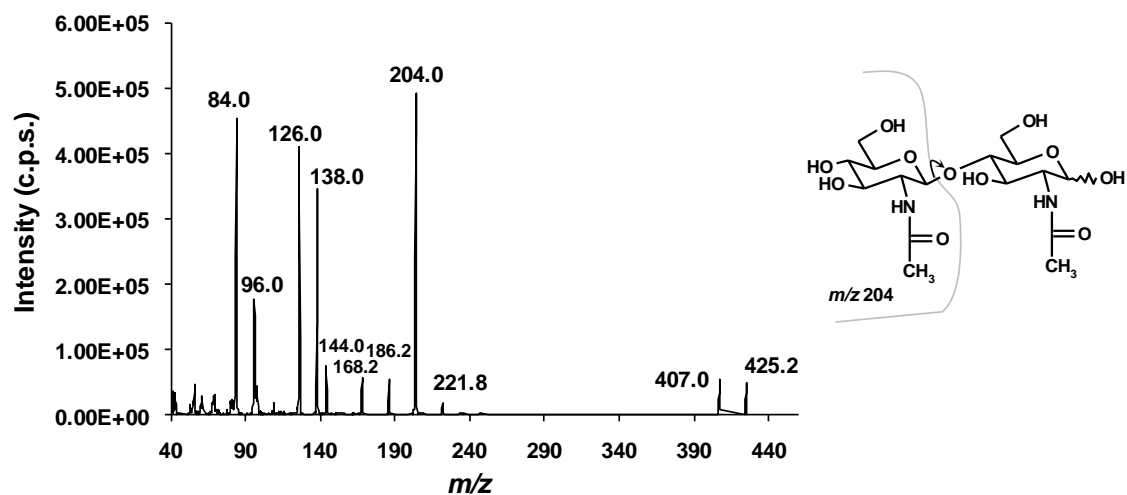

Fig. S3 MS/MS spectrum of GlcNAc<sub>2</sub>

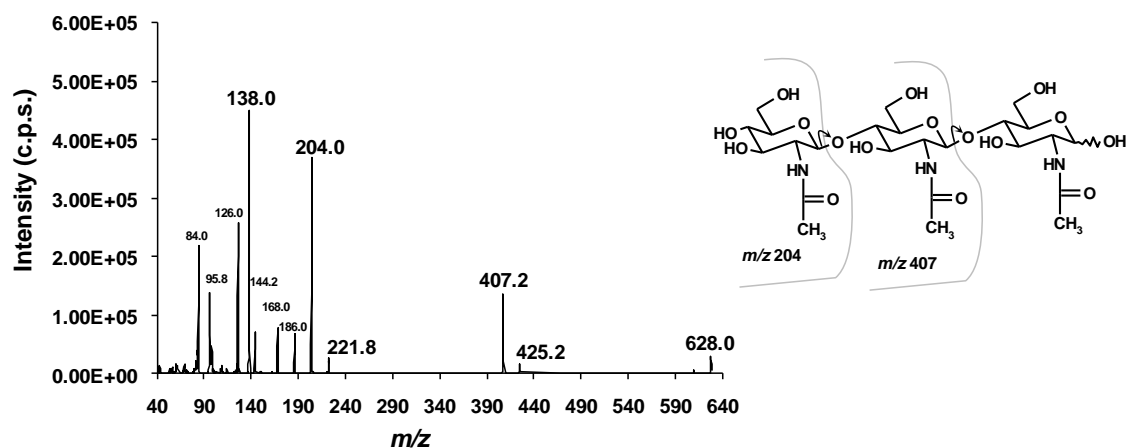

Fig. S4 MS/MS spectrum of GlcNAc<sub>3</sub>

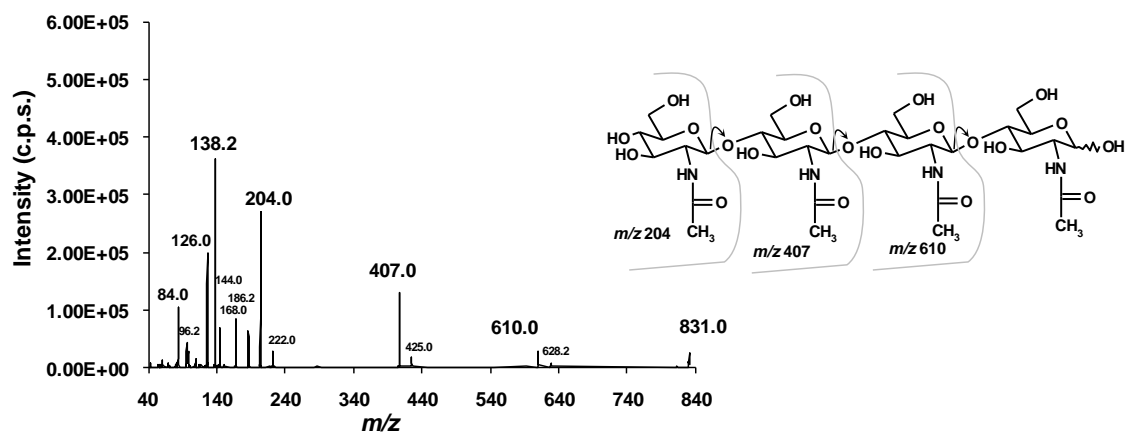

Fig. S5 MS/MS spectrum of GlcNAc<sub>4</sub>

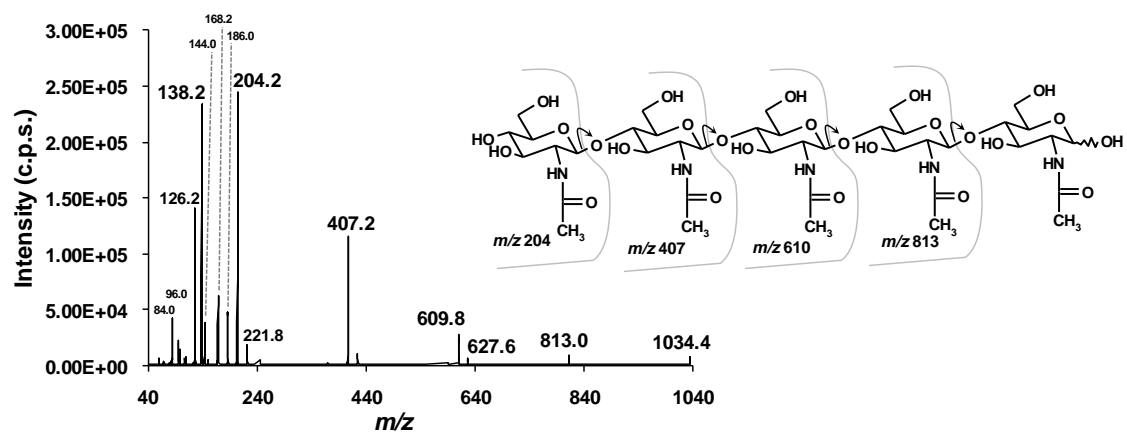

Fig. S6 MS/MS spectrum of GlcNAc<sub>5</sub>

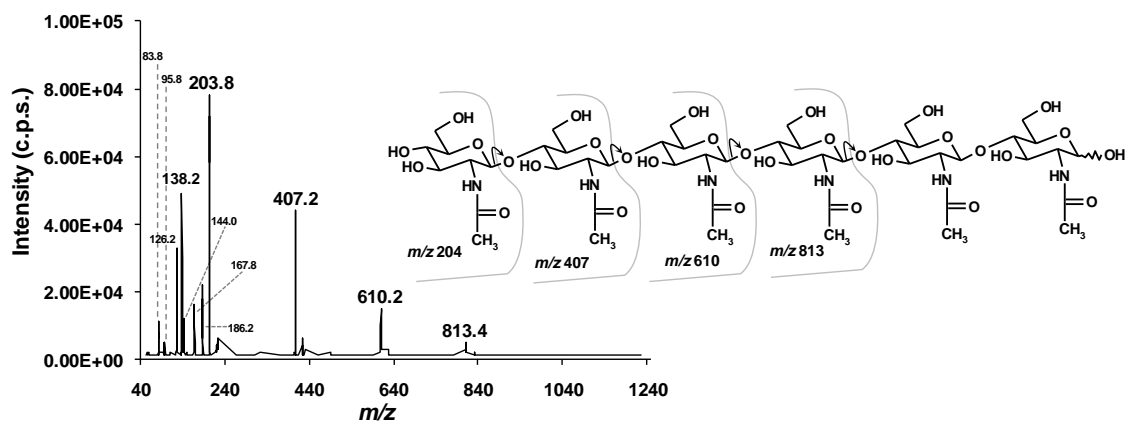

Fig. S7 MS/MS spectrum of GlcNAc<sub>6</sub>

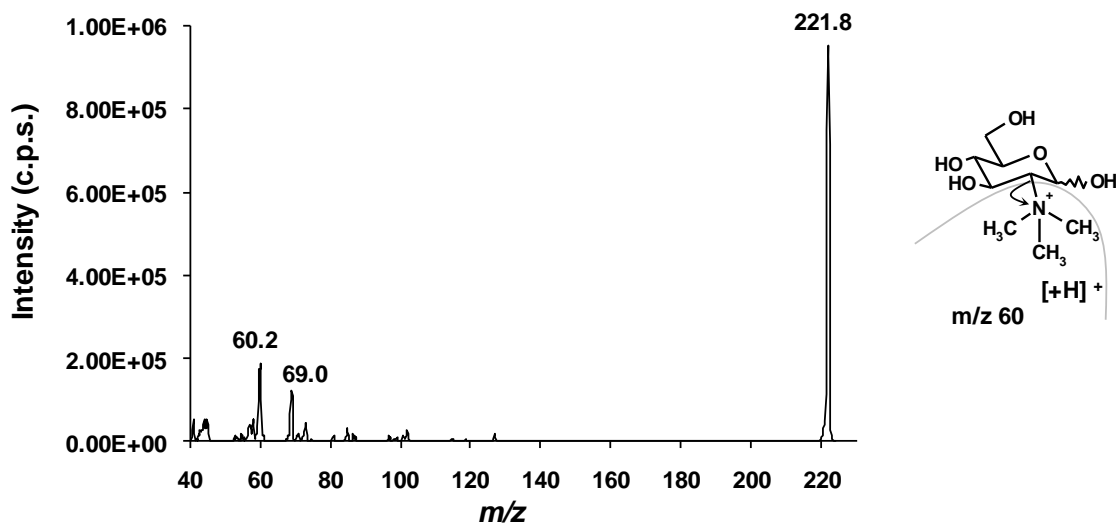

Fig. S8 MS/MS spectrum of TMG

### Section-3: Enzymatic characteristics of SCO2758 and SCO2786.

#### 3-1: SDA-PAGE analyses.

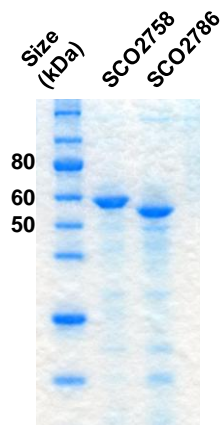

**Fig. S9 SDS-PAGE of SCO2758 and SCO2786**

#### 3-2: Enzymatic properties of SCO2758 and SCO2786.

Table S1. Enzymatic properties of SCO 2758 and SCO2786

| Properties                                                       | SCO2758 | SCO2786 |
|------------------------------------------------------------------|---------|---------|
| Family                                                           | GH3     | GH20    |
| Optimum pH <sup>a</sup>                                          | pH 6.5  | pH 4.4  |
| $V_{\max}$ ( $\mu\text{mol}/\text{min}/\text{mg}$ ) <sup>b</sup> | 0.423   | 44.9    |
| $K_m$ (mM) <sup>b</sup>                                          | 72.7    | 79.3    |

<sup>a</sup> Toward 0.5 mM *p*NP-GlcNAc in 50 mM citrate-phosphate-borate buffer at 37°C for 60 min. <sup>b</sup> Toward *p*NP-GlcNAc.

Section-4: Lineweaver-Burk plots of 2 and 3.

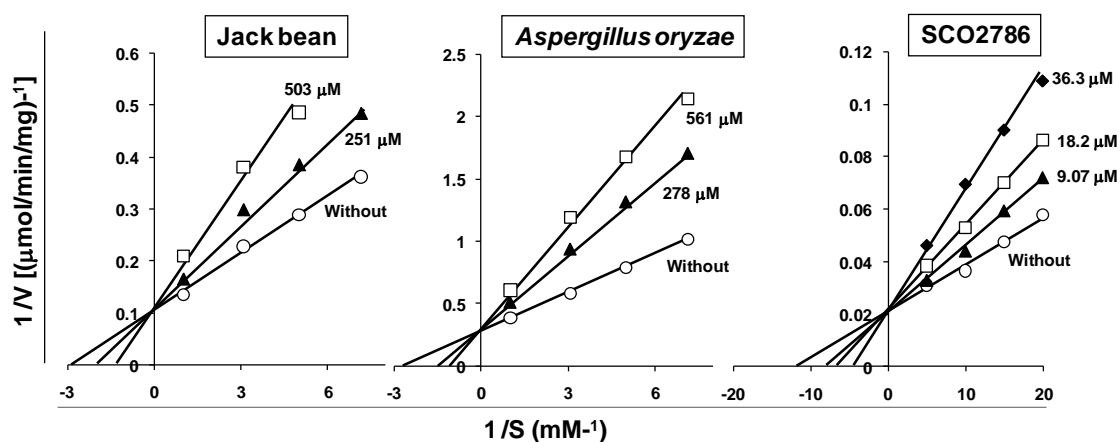

Fig. S10 Lineweaver-Burk plots of TMG-chitomonocin(3)

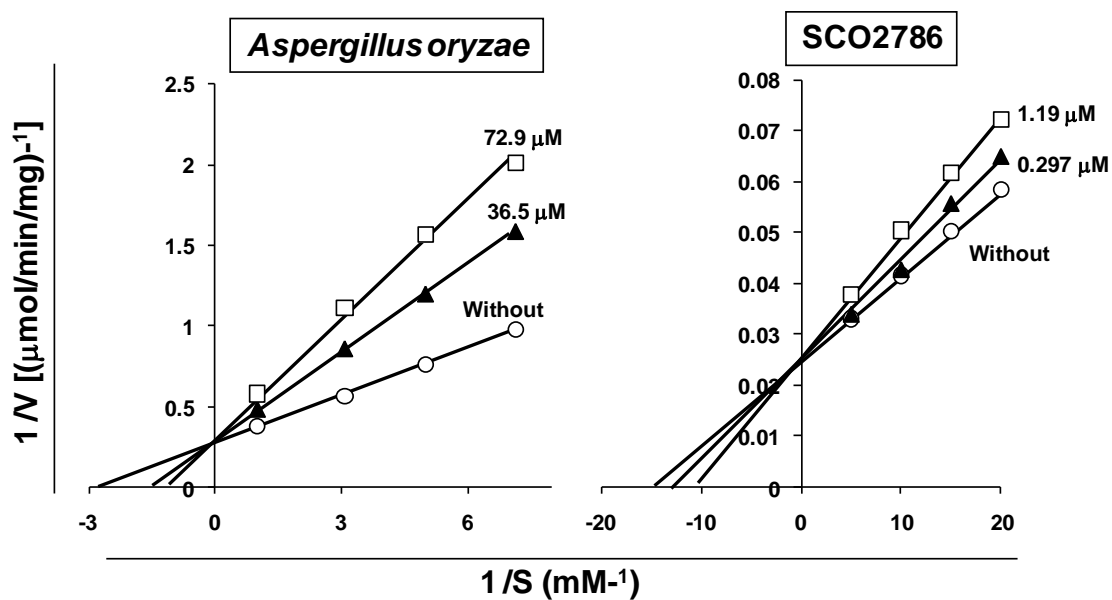

Fig. S11 Lineweaver-Burk plots of TMG-chitobiocin(2)

**Section-5: NMR data of 2 and 3.**

Table S2. <sup>1</sup>H- and <sup>13</sup>C-NMR data of TMG-chitomonomycin (**3**)

| Sugar A (TMG)                        | Anomer of reducing end GlcNAc | $\delta_{\text{H}}$ (mult. $J$ in Hz)<br>600 MHz | $\delta_{\text{C}}$<br>150 MHz |
|--------------------------------------|-------------------------------|--------------------------------------------------|--------------------------------|
| 1                                    | $\alpha$                      | 5.42 (d, 3.8)                                    | 96.580                         |
|                                      | $\beta$                       | 5.41 (d, 4.1)                                    | 96.370                         |
| 2                                    | $\alpha$                      | 3.637 (dd, 3.8, 7.2)                             | 79.030                         |
|                                      | $\beta$                       | 3.637 (dd, 4.1, 7.2)                             | 78.910                         |
| 3                                    | $\alpha$                      | 4.04 (dd, 7.2, 8.8)                              | 69.990                         |
|                                      | $\beta$                       | 4.04 (dd, 7.2, 8.8)                              | 70.020                         |
| 4                                    | $\alpha$                      | 3.89 (dd, 8.8, 10.1)                             | 69.300                         |
|                                      | $\beta$                       | 3.89 (dd, 8.8, 10.1)                             | 69.400                         |
| 5                                    | $\alpha$                      | 3.67(ddd, 2.6, 6.1, 10.1)                        | 77.120                         |
|                                      | $\beta$                       | 3.67(ddd, 2.6, 6.1, 10.1)                        | 77.090                         |
| 6a                                   | $\alpha$                      | 3.78(dd, 6.1, 13.0)                              | 61.120                         |
|                                      | $\beta$                       | 3.78(dd, 6.1, 13.0)                              | 61.190                         |
| 6b                                   | $\alpha$                      | 3.84 (dd, 2.6, 13.0)                             | 61.120                         |
|                                      | $\beta$                       | 3.90 (dd, 2.6, 13.0)                             | 61.190                         |
| 7-9                                  | $\alpha$                      | 3.322(s)                                         | 54.38                          |
|                                      | $\beta$                       | 3.318(s)                                         | 54.38                          |
| <b>Sugar B (reducing end GlcNAc)</b> |                               |                                                  |                                |
| 1                                    | $\alpha$                      | 5.19 (d, 3.5)                                    | 91.35                          |
|                                      | $\beta$                       | 4.71 (d, 8.5)                                    | 95.55                          |
| 2                                    | $\alpha$                      | 3.92 (dd, 3.5, 10.5)                             | 54.99                          |
|                                      | $\beta$                       | 3.70 (dd, 8.5, 10.0)                             | 57.75                          |
| 3                                    | $\alpha$                      | 4.03 (dd, 9.3, 10.5)                             | 69.32                          |
|                                      | $\beta$                       | 3.68 (dd, 9.4, 10.0)                             | 75.19                          |
| 4                                    | $\alpha$                      | 3.88 (overlapped)                                | 77.68                          |
|                                      | $\beta$                       | 3.90 (overlapped)                                | 78.15                          |
| 5                                    | $\alpha$                      | 4.08 (overlapped)                                | 70.71                          |
|                                      | $\beta$                       | 3.84 (overlapped)                                | 72.11                          |
| 6a                                   | $\alpha$                      | 3.80 (dd, 6.2, 12.2)                             | 62.04                          |
|                                      | $\beta$                       | 3.80 (dd, 6.2, 12.2)                             | 61.98                          |
| 6b                                   | $\alpha$                      | 3.89 (overlapped)                                | 62.04                          |
|                                      | $\beta$                       | 3.89 (overlapped)                                | 61.98                          |
| 7                                    | $\alpha$                      | -                                                | 175.26 <sup>a</sup>            |
|                                      | $\beta$                       | -                                                | 175.49 <sup>a</sup>            |
| 8                                    | $\alpha$                      | 2.046 (s)                                        | 22.55 <sup>a</sup>             |
|                                      | $\beta$                       | 2.044 (s)                                        | 22.83 <sup>b</sup>             |

<sup>a,b</sup> Could be interchanged with one another.



Table S3. <sup>1</sup>H- and <sup>13</sup>C-NMR data of TMG-chitobiomycin (**2**)

| Sugar A (TMG)                        | Anomer of reducing end GlcNAc | $\delta_{\text{H}}$ (mult. <i>J</i> in Hz)<br>600 MHz | $\delta_{\text{C}}$<br>150 MHz |
|--------------------------------------|-------------------------------|-------------------------------------------------------|--------------------------------|
| 1                                    | -                             | 5.41(d, 3.8)                                          | 96.400                         |
| 2                                    | -                             | 3.63(dd, 3.8, 8.1)                                    | 78.940                         |
| 3                                    | -                             | 4.04(dd, 8.1, 8.1)                                    | 70.010                         |
| 4                                    | -                             | 3.88(dd, 8.1, 8.1)                                    | 69.360                         |
| 5                                    | -                             | 3.66 (ddd, 2.1, 5.9, 8.1)                             | 77.120                         |
| 6a                                   | -                             | 3.78(dd, 5.9, 12.4)                                   | 61.000                         |
| 6b                                   | -                             | 3.91(dd, 2.1, 12.4)                                   | -                              |
| 7-9                                  | -                             | 3.32(s)                                               | 54.41                          |
| <b>Sugar B</b>                       |                               |                                                       |                                |
| 1                                    | $\alpha$                      | 4.59(d, 8.5)                                          | 101.99                         |
|                                      | $\beta$                       | 4.58(d, 8.2)                                          | 101.99                         |
| 2                                    | $\alpha$                      | 3.80 (overlapped)                                     | 56.66                          |
|                                      | $\beta$                       | 3.78 (overlapped)                                     | 56.62                          |
| 3                                    | -                             | 3.72 (overlapped)                                     | 75.11                          |
| 4                                    | -                             | 3.89 (overlapped)                                     | 77.53                          |
| 5                                    | -                             | 3.88 (overlapped)                                     | 70.63                          |
| 6a                                   | -                             | 3.78 (dd, 5.9, 12.4)                                  | 61.97                          |
| 6b                                   | -                             | 3.88 (dd, 2.2, 12.6)                                  | -                              |
| 7                                    | $\alpha$                      | -                                                     | 175.41 <sup>a</sup>            |
|                                      | $\beta$                       | -                                                     | 175.35 <sup>a</sup>            |
| 8                                    | $\alpha$                      | 2.07(s)                                               | 22.83 <sup>b</sup>             |
| <b>Sugar C (reducing end GlcNAc)</b> |                               |                                                       |                                |
| 1                                    | $\alpha$                      | 5.18(d, 2.4)                                          | 91.13                          |
|                                      | $\beta$                       | 4.69(d, 7.9)                                          | 95.47                          |
| 2                                    | $\alpha$                      | 3.88(overlapped)                                      | 54.31                          |
|                                      | $\beta$                       | 3.68(overlapped)                                      | 56.78                          |
| 3                                    | $\alpha$                      | 3.88(overlapped)                                      | 69.96                          |
|                                      | $\beta$                       | 3.68(overlapped)                                      | 73.18                          |
| 4                                    | $\alpha$                      | 3.62,(overlapped)                                     | 80.31                          |
|                                      | $\beta$                       | 3.62,(overlapped)                                     | 79.86                          |
| 5                                    | $\alpha$                      | 3.89(overlapped)                                      | 71.71                          |
|                                      | $\beta$                       | 3.51(ddd, 2.1, 5.3, 9.7)                              | 75.21                          |
| 6a                                   | $\alpha$                      | 3.78(dd, 5.9, 12.4)                                   | 60.76                          |
|                                      | $\beta$                       | 3.65(dd, 5.3, 12.4)                                   | 60.64                          |
| 6b                                   | $\alpha$                      | 3.92(overlapped)                                      | -                              |
|                                      | $\beta$                       | 3.83(dd, 2.1, 12.4)                                   | -                              |
| 7                                    | $\alpha$                      | -                                                     | 175.35 <sup>a</sup>            |
|                                      | $\beta$                       | -                                                     | 175.15 <sup>a</sup>            |
| 8                                    | $\alpha$                      | 2.033(s)                                              | 22.77 <sup>b</sup>             |
|                                      | $\beta$                       | 2.031(s)                                              | 22.54 <sup>b</sup>             |

<sup>a,b</sup> Could be interchanged with one another.

**<sup>1</sup>H, Compound (2)**

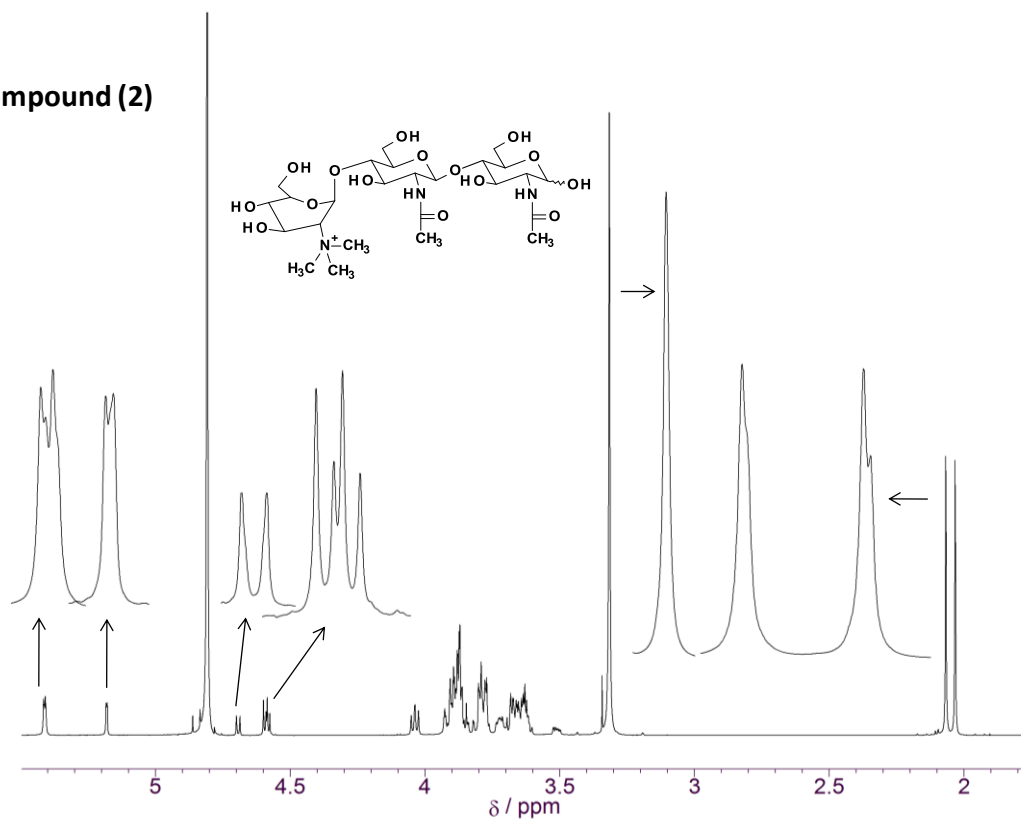

**<sup>13</sup>C, Compound (2)**

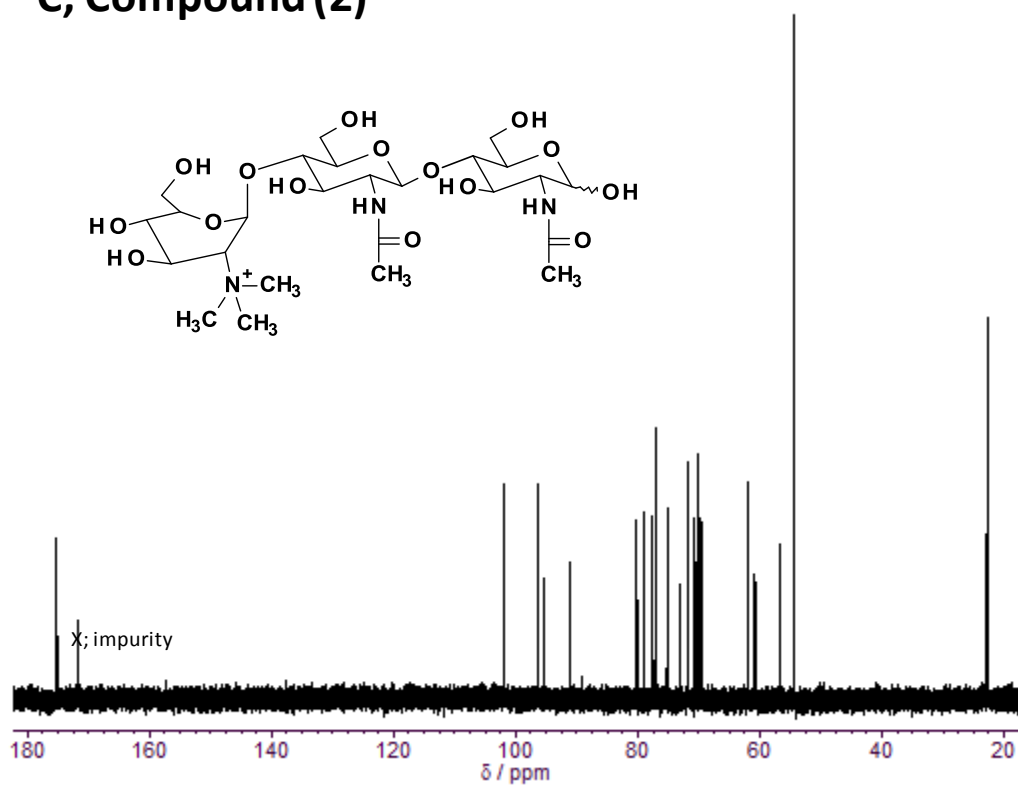

COSY, Compound (2)

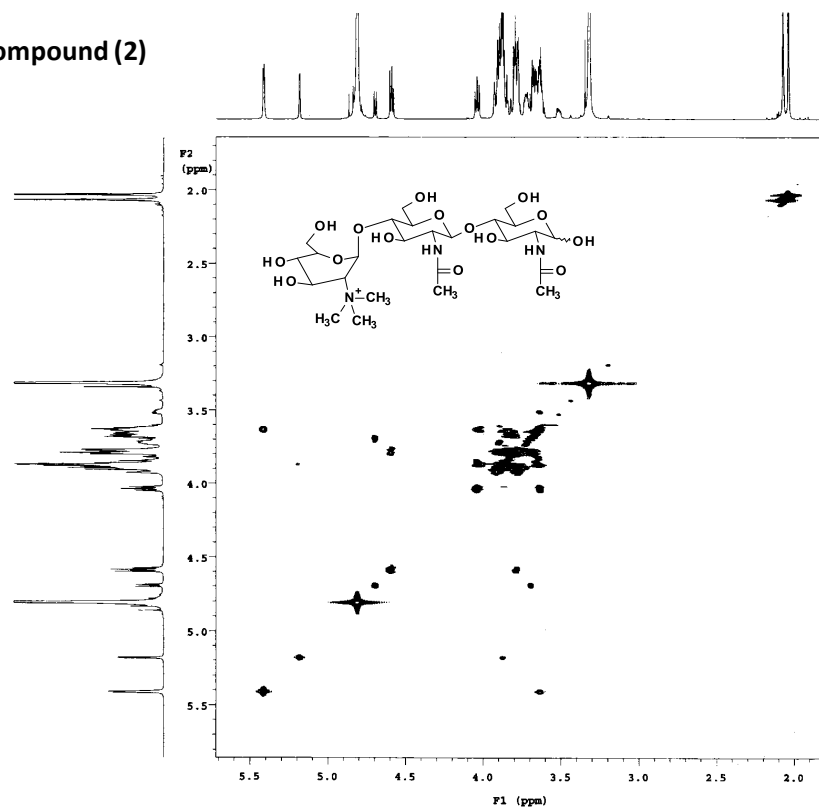

HSQC, Compound (2)

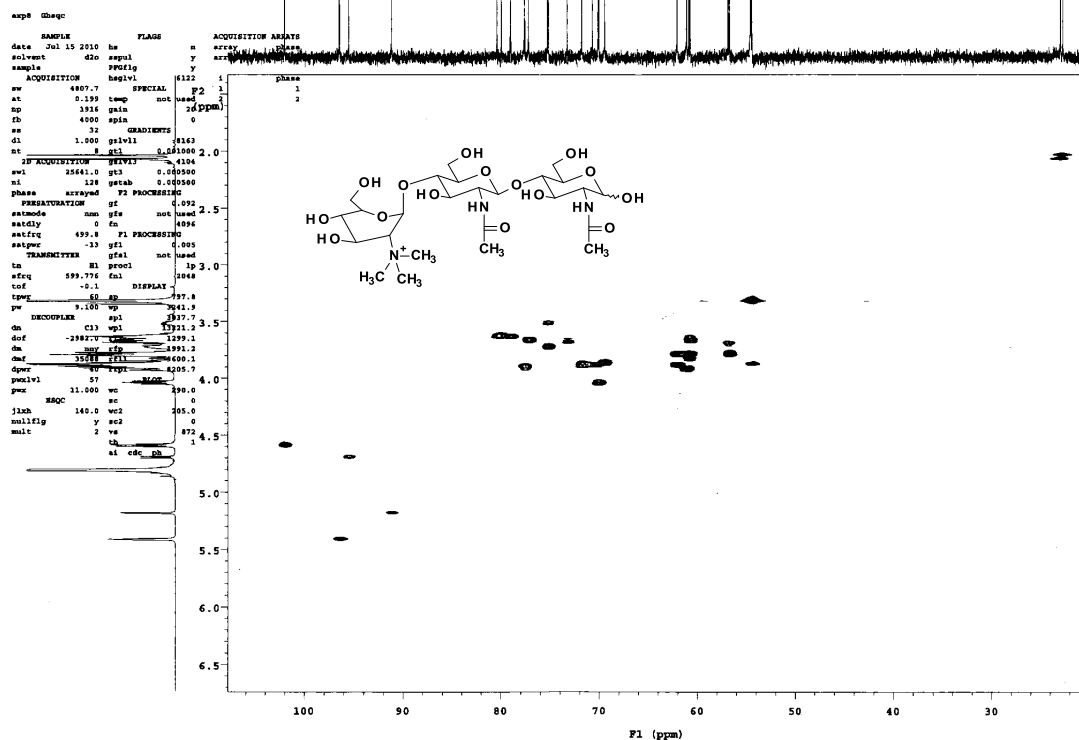

### HMBC, Compound (2)

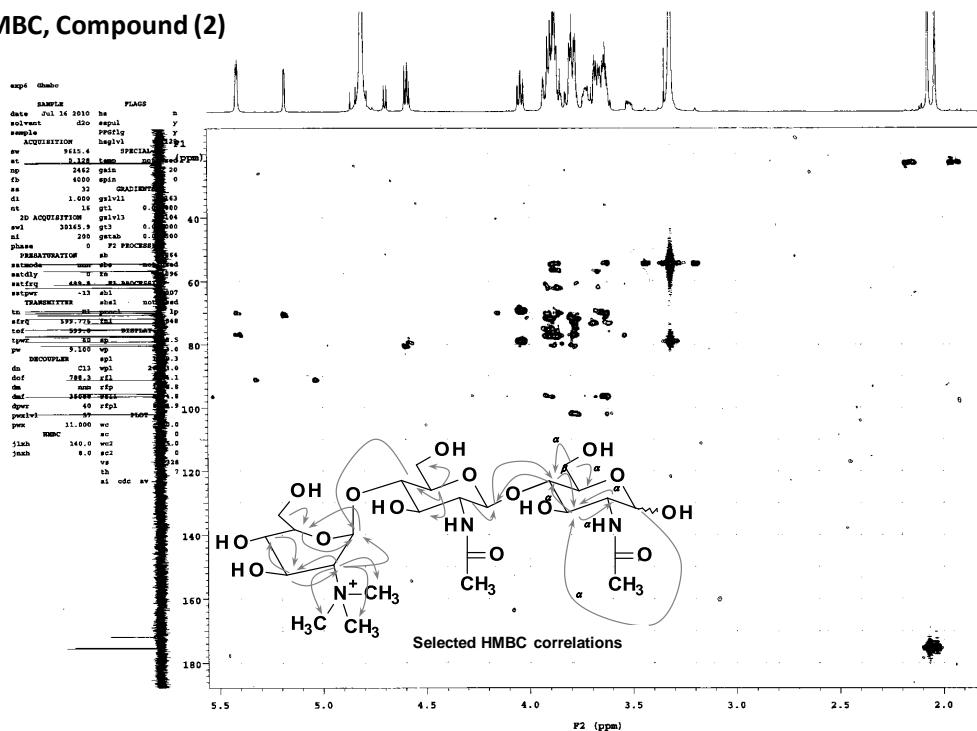

### NOESY, Compound (2)

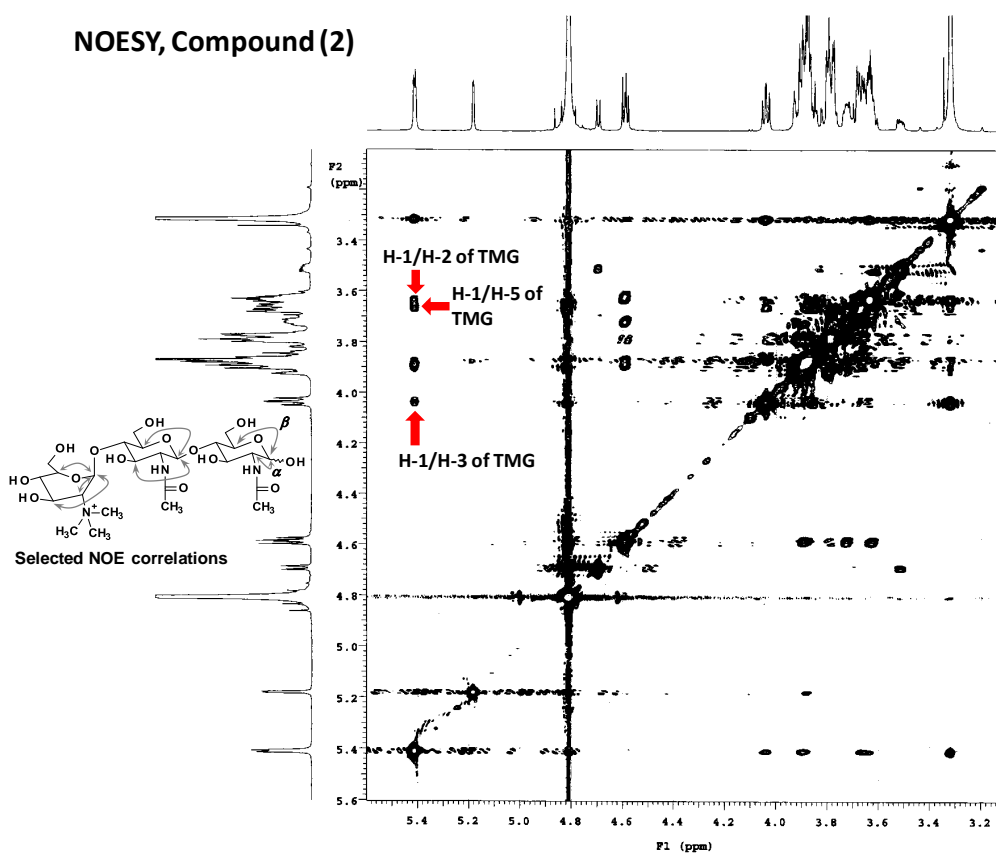

### $^1\text{H}$ , Compound (3)

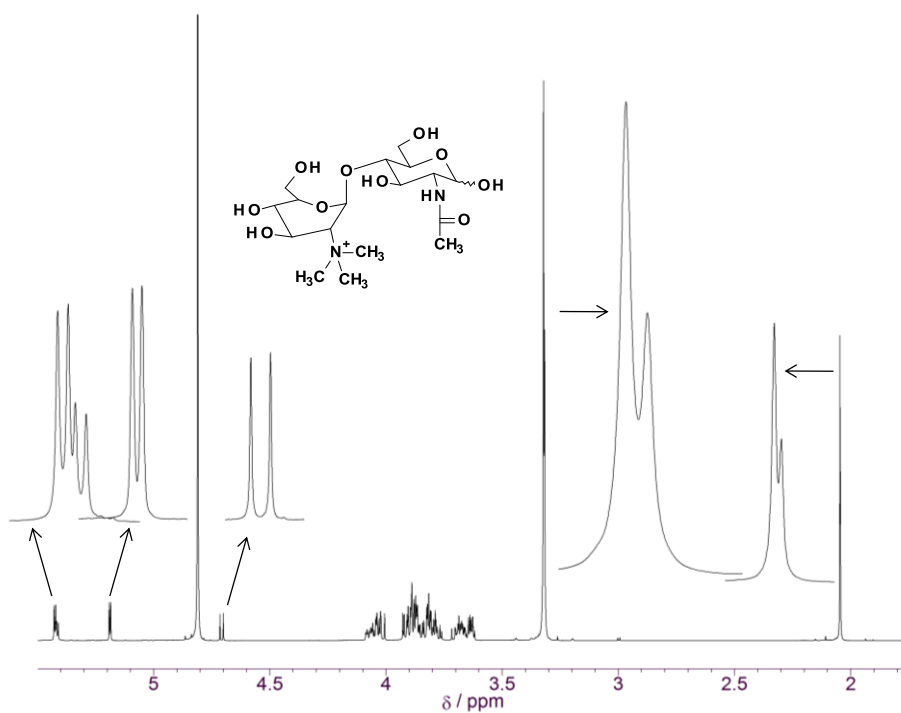

### $^{13}\text{C}$ , Compound (3)

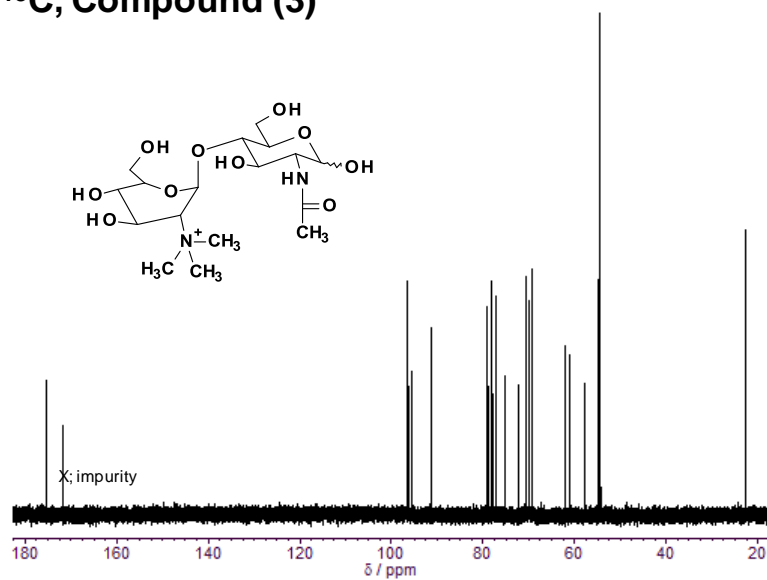

### COSY, Compound (3)

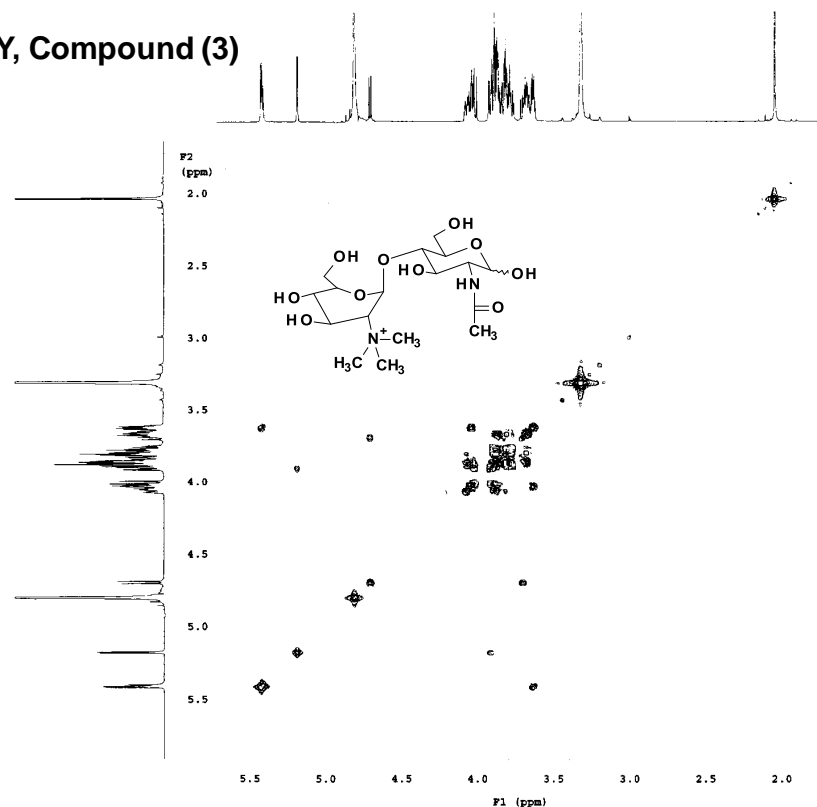

### HSQC, Compound (3)

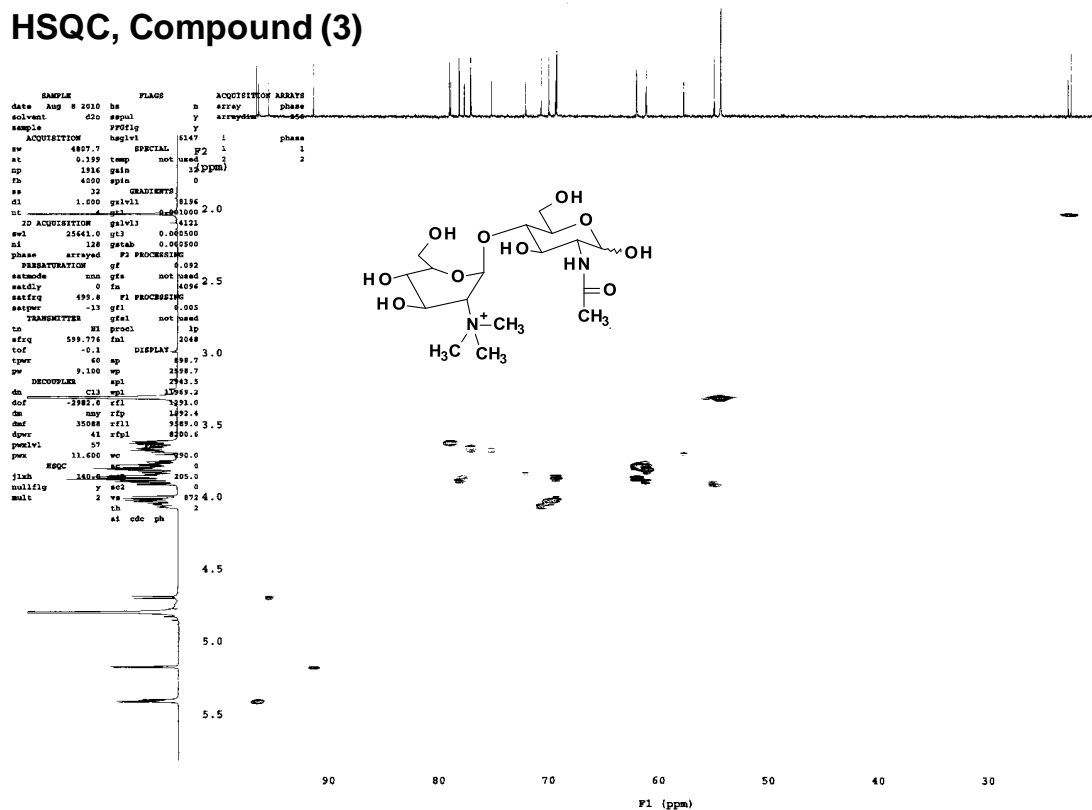

```

SAMPLE          FLAGS      ACQUISITION  ABBREV
date Aug 8 2010  hs          n          array  phase
solvent d2o          spul          y          airysol
sample          y          1          1
ACQUISITION    hsqc          1247       1          phase
sw          4897.7      SPECIAL    p2 1       1
at          0.159      temp      not used   1
sp          1916      gain      150ppm
rb          4000      sftn      0
ss          12          GRADIENTS
d1          1.000      gain1     8194
ut          1000000
ID ACQUISITION g31v1     1422
sw1         25641.0    g31      0.001500
ni          128      gainab  0.001500
phase arrayed  F2 PROCESSING
PRESATURATION  gf          0.092
satmode      non gfa      not used   2.5
sacclty      0          fa          14096
satfreq      499.8      f1 PROCESSING
satpwr       -13        gfl          0.005
TRANSMITTER   gfl          not used
to           31      p1          1p
sfreq        599.776  fml          3048
tof          -0.1      DISPLAY
tpr          60          sp          898.7
pw          3.100      mp          2398.7
DECOUPLE      sp1          2742.5
dn           C13 sp1     12049.2
dof         -2392.0    cfl          3091.0
dn          nov      f2          1422.4
dof         35088    rfl1        3889.0 3.5
dof         41      rfl1        4300.6
powlvl      07
pwr         11.600    wv          930.0
hsqc        140.0      wv          205.0
flash       y          sec2        0
multifly    2          va          672 4.0
mult        2          va          672 4.0
          1          cdc      ph          2
    
```

### HMBC, Compound (3)

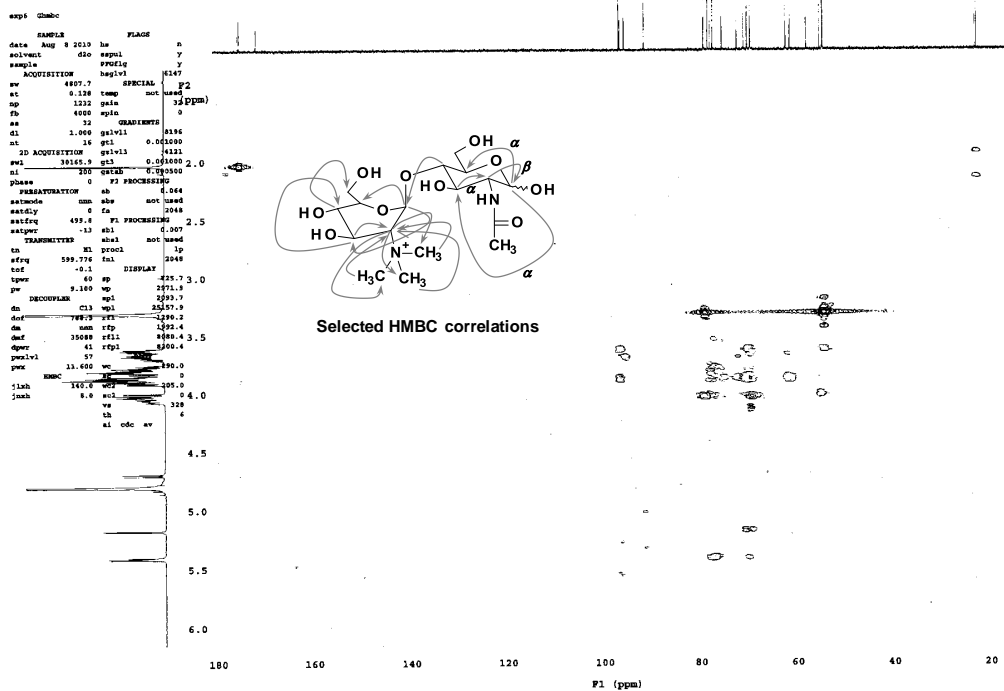

### NOESY, Compound (3)

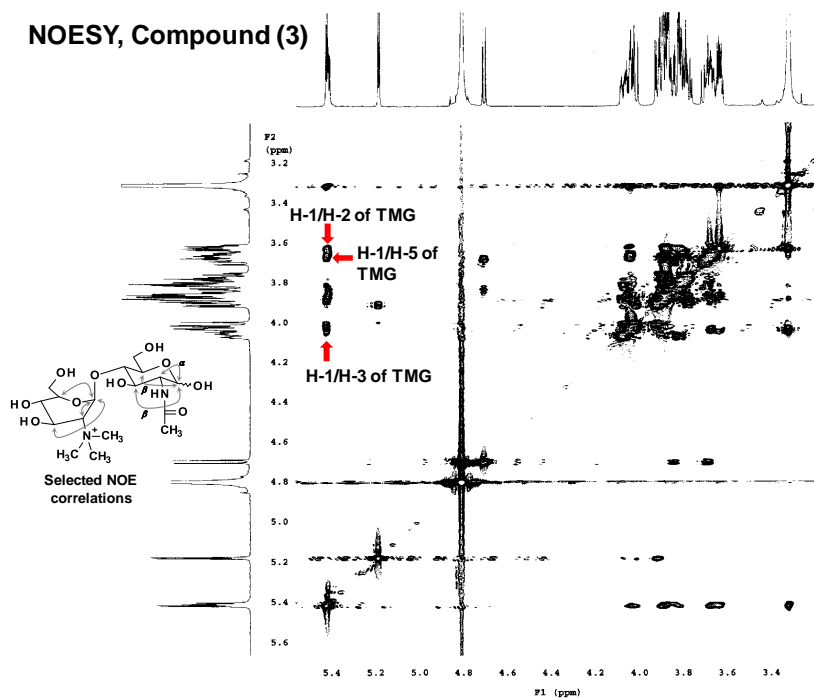

### Section-6: NOESY spectra of free TMG and its ${}^4C_1$ conformation

A free  $D$ -TMG was synthesized as described in our previous study<sup>1)</sup>. The synthesized  $D$ -TMG was subjected to the  ${}^1H$ -NMR and NOESY experiments in  $D_2O$  to clarify its conformation. Assignment of  ${}^1H$ -NMR signals was shown in the inner table of Fig.S12. The  $J$ -values of the observed  ${}^1H$  signals and the NOE correlations of H-1/H-2 and H-3/H-5 indicated that free  $D$ -TMG form a typical  ${}^4C_1$  conformation with an  $\alpha$  anomeric configuration.

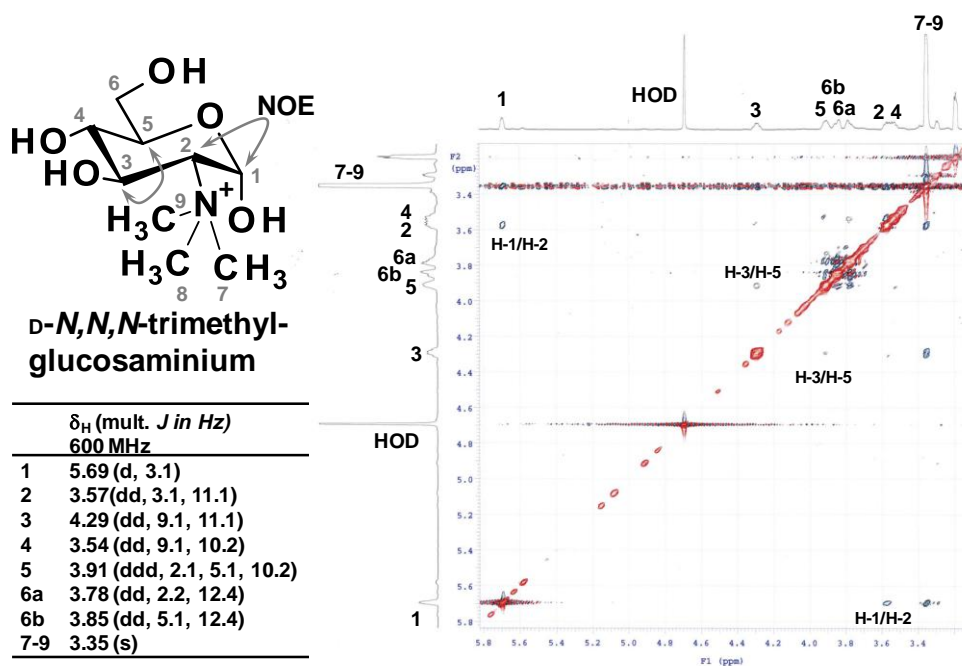

Fig.S12 NOESY spectra of free  $D$ - $N,N,N$ -trimethylglucosaminium (TMG)

#### Reference

- 1) H. Usuki, T. Nitoda, M. Ichikawa, N. Yamaji, T. Iwashita, H. Komura and H. Kanzaki, J. Am. Chem. Soc., 2008, 130, 4146-4152.



**Section-7: Construction of ligand for docking simulations with *SpHex*.**

A GlcNAc<sub>2</sub> unit was attached to the *twist-boat* form of TMG residue with  $\beta$ -1,4 linked manner followed by MMFF calculation to obtained the conformational structure (Fig. S13). The structure was used as the ligand for the docking simulation toward *SpHex*.

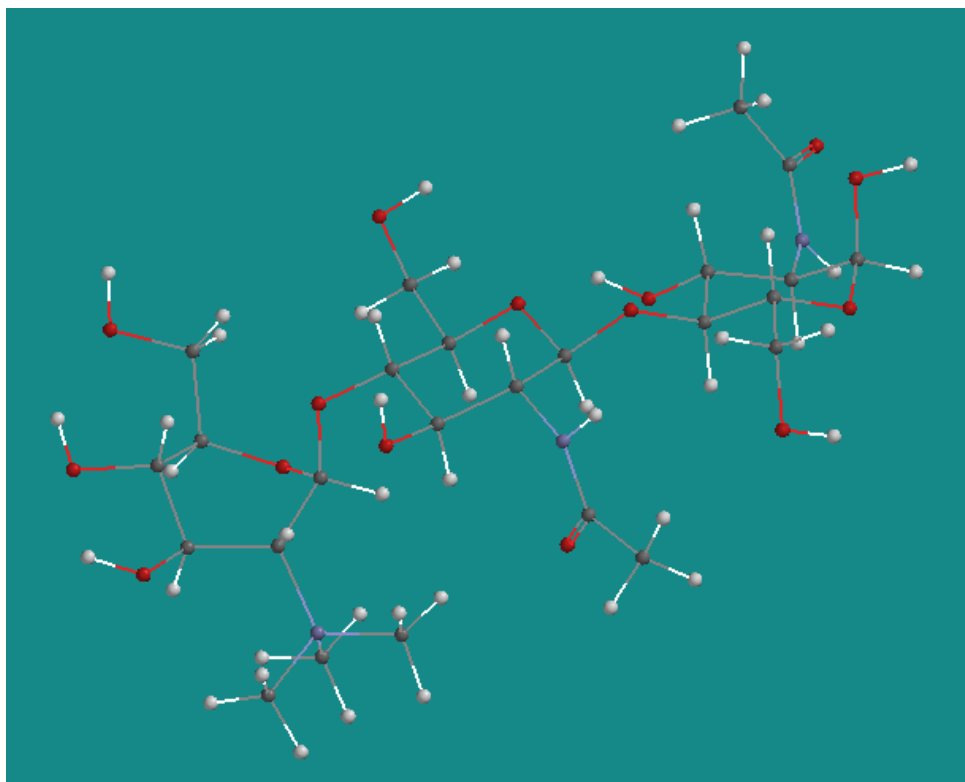

**Fig. S13 Conformational structure of (2) as a ligand for the docking simulation**

### Section-8: Docking simulation between the TMG( ${}^4C_1$ form)-chitobiomycin and *SpHex*.

TMG( ${}^4C_1$  form)-chitobiomycin was constructed followed by the computational docking simulation toward *SpHex*. All of the procedures for this analysis were the same to that described in the main text. The result was shown in the Fig. S14. As shown in the figure, the TMG( ${}^4C_1$  form)-chitobiomycin was predicted to be positioned at the surface of the protein, not the inside of the catalytic pocket. This result might indicate the essential effect of the *twist-boat* conformation of TMG to occupy the -1 subsite of the enzyme because the TMG(*twist-boat* form)-chitobiomycin was predicted to be positioned inside the catalytic pocket (see Fig. 7 of the main text).

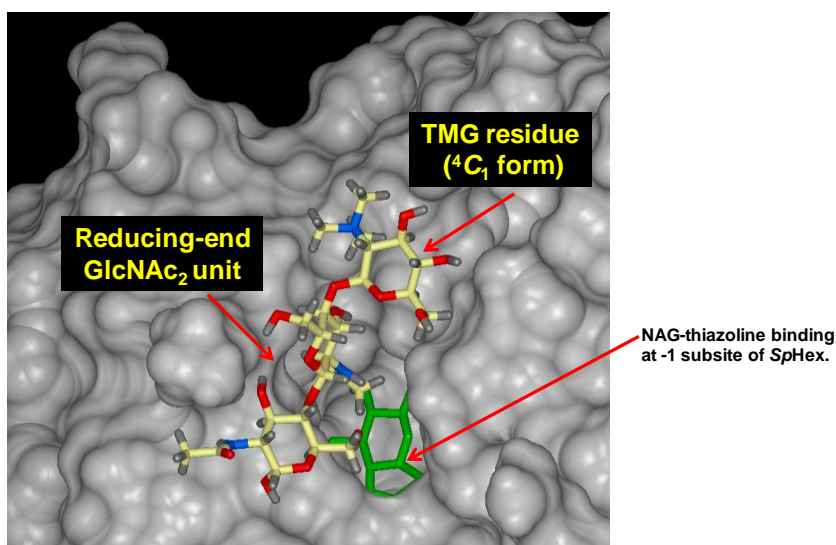

Fig. S14. Result of the docking simulation between the TMG( ${}^4C_1$  form)-chitobiomycin and *SpHex*.

### Section-9: UV absorption spectra of 2 and 3.

Compound 2 and 3 were dissolved in H<sub>2</sub>O (2: 212  $\mu$ M, 3: 304  $\mu$ M) followed by measuring their UV absorption spectra using the U 2800 Spectrometer (HITACHI). A quartz cell (l=1cm) was used for this analysis. As shown in Fig. S15, those of two compounds were quite a similar as expected by their chemical structures.

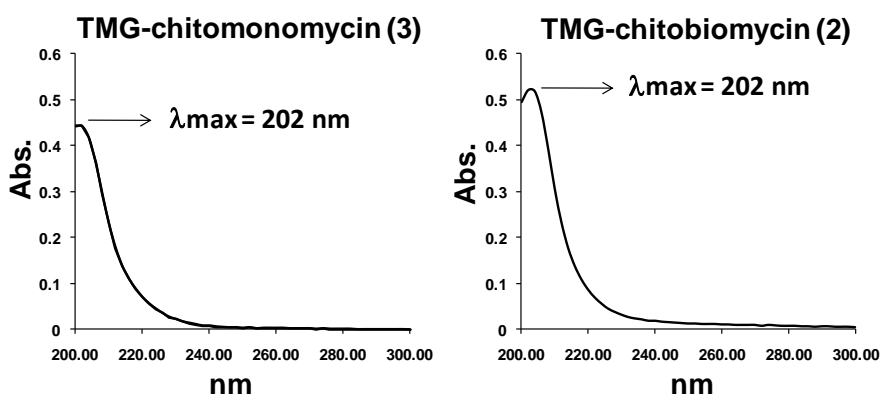

Fig. S15. UV absorption spectra of (2) and (3).
